# Supplementary material
Source: MDPI journal article supplement (https://www.mdpi.com/2624-8174/6/2/41)
Supplement: s1 [file s1]

# Supplementary Materials: Statistical Mechanics of Social Hierarchies: A Mathematical Model for the Evolution of Human Societal Structures

Nestor Caticha <sup>1,†</sup>  0000-0002-7446-6765, Rafael S. Calsaverini <sup>2,†</sup> and Renato Vicente <sup>2,\*</sup>  0000-0003-0671-9895

## 1. The onset and breakdown of egalitarianism arising from the competition of cognitive and social navigation needs.

In Figure S1 we show the effect, on the expected values of the average and maximum degrees, of changing the size of population. The reader used to studying the thermodynamical limit should not be tempted to do so in this case because we are looking at transitions induced by the change in the population size. The figure shows the approximate behavior as a function of the specific cognitive capacity  $z$ .

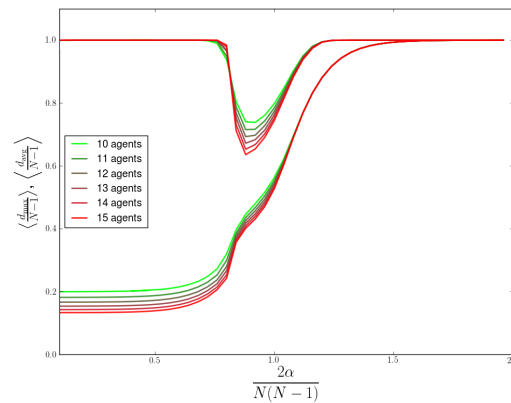

**Figure S1.** Monte Carlo estimates of the maximum degree and the average degree of the social web representation as a function of  $z = 2\alpha/n(n-1)$  for  $\beta = 6$ . This shows that the scaling of  $\alpha$  with  $n(n-1)/2$  is a good approximation that gets better for larger values of  $n$ .

From the frequencies of the different cases in the empirical record [1] and from the Monte Carlo we extracted the values of the conditional probabilities and standard deviations, shown in Figures S2 and S3.

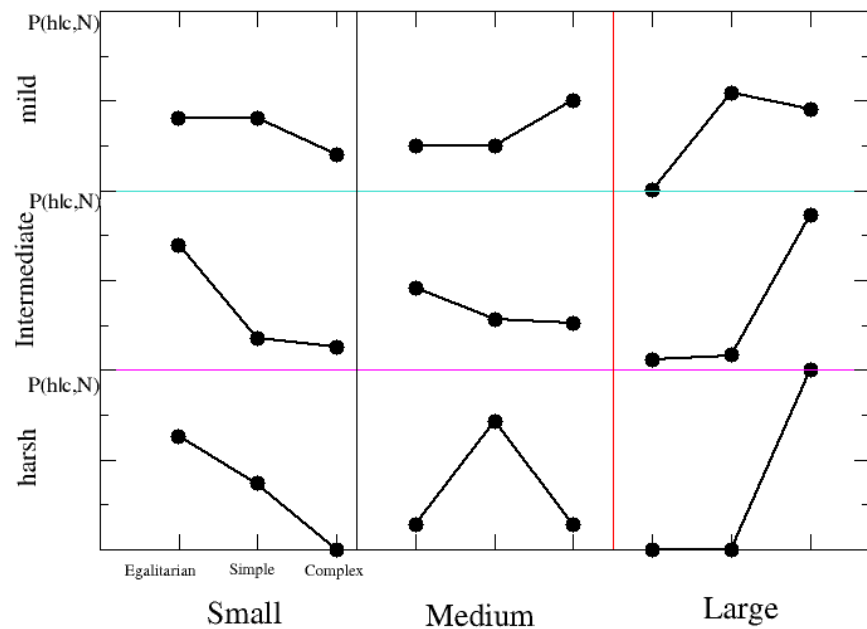

**Figure S2.** Conditional Probability distributions  $P(h|s, c)$  obtained from the Ethnographic Atlas data set.

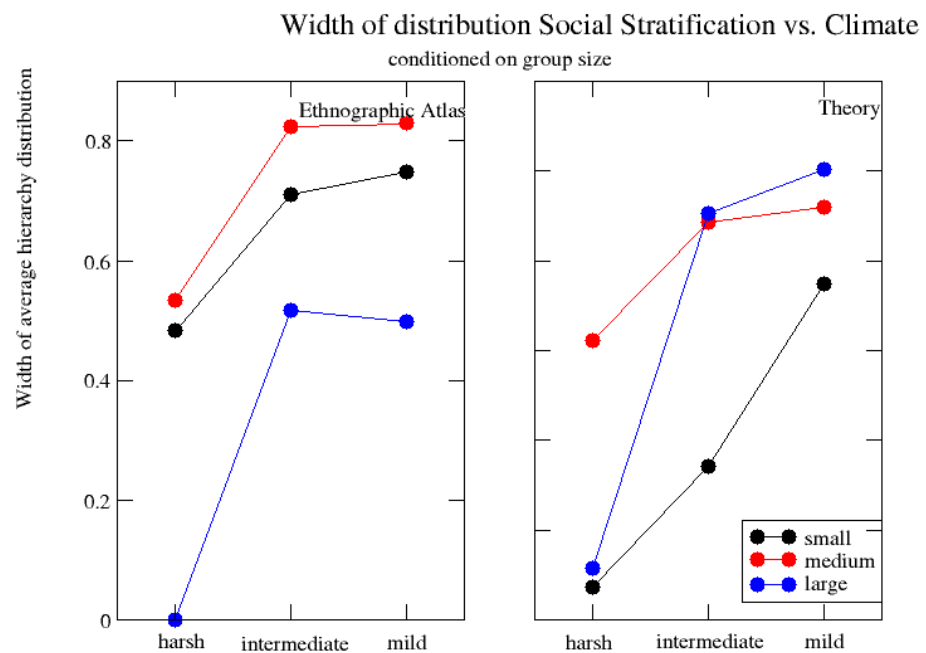

**Figure S3.** The standard deviation of the distribution of expected hierarchies, or range of values of hierarchy as a function of ecological pressure for small, medium and large groups. Left: From the Ethnographic Atlas data [1]. Right: Theoretical prediction

## 2. Bibliography

1. Douglas R. White and Burton M and Divale W and Gray P and Korotayev A and Khalturina D, *Standard Cross Cultural Sample Codebook*, [https://growthecon.com/assets/Standard\\_Cross-Cultural\\_Sample-Codebook.pdf](https://growthecon.com/assets/Standard_Cross-Cultural_Sample-Codebook.pdf) and *EthnographicAtlasWCRevisedByWorldCultures.sav*, 2011

4. Ethnographic Atlas Data

In Table S1 we show the number of data points (ethnographic groups) in the EA relevant for this study. The numerical data extracted from the EA is shown in Table S2 and the corresponding theoretical numbers in Table S3.

**Table S1.** The number of data points (ethnographic groups) in the EA relevant for this study

| ↓Stratification | Climate | Number of cultures in<br>Small groups | Number of cultures in<br>Medium groups | Number of cultures in<br>Large groups |
|-----------------|---------|---------------------------------------|----------------------------------------|---------------------------------------|
| 1               | 1       | 12                                    | 1                                      | 0                                     |
| 1               | 2       | 43                                    | 40                                     | 2                                     |
| 1               | 3       | 4                                     | 3                                      | 0                                     |
| 2               | 1       | 7                                     | 5                                      | 0                                     |
| 2               | 2       | 11                                    | 25                                     | 3                                     |
| 2               | 3       | 4                                     | 3                                      | 6                                     |
| 3               | 1       | 0                                     | 1                                      | 3                                     |
| 3               | 2       | 8                                     | 23                                     | 31                                    |
| 3               | 3       | 2                                     | 6                                      | 5                                     |

#### 4.1. Numerical results

**Table S2.** The results for the empirical stratification  $\bar{H}$

| ↓Climate, Group size → | Small | Medium | Large groups |
|------------------------|-------|--------|--------------|
| Harsh                  | 0.37  | 1.0    | 2.0          |
| Intermediate           | 0.44  | 0.81   | 1.81         |
| Mild                   | 0.80  | 1.25   | 1.45         |

**Table S3.** The results for the theoretical prediction  $H_T$

| ↓Climate, Group size → | Small | Medium | Large groups |
|------------------------|-------|--------|--------------|
| Harsh                  | 0.01  | 0.64   | 1.58         |
| Intermediate           | 0.13  | 0.56   | 1.25         |
| Mild                   | 0.39  | 0.58   | 0.77         |

#### 4.2. Ethnographic data

**Table S4.** V31. Mean Size of Local Communities

| N   | Code | Description v31.                          | Size category |
|-----|------|-------------------------------------------|---------------|
| 681 | 0    | Missing data (code .)                     | 0             |
| 118 | 1    | Fewer than 50                             | 1             |
| 107 | 2    | 50-99                                     | 1             |
| 104 | 3    | 100-199                                   | 2             |
| 83  | 4    | 200-399                                   | 2             |
| 60  | 5    | 400-1000                                  | 2             |
| 16  | 6    | 1,000 without any town of more than 5,000 | 3             |
| 36  | 7    | Towns of 5,000-50,000 (one or more)       | 3             |
| 62  | 8    | Cities of more than 50,000 (one or more)  | 3             |

**Table S5.** V66. Class Stratification

| N   | Code | Description v66.                                         | Hierarchy category |
|-----|------|----------------------------------------------------------|--------------------|
| 182 | 0    | Missing data (code .)                                    | 0                  |
| 533 | 1    | Absence among freemen (O.)                               | 1                  |
| 206 | 2    | Wealth distinctions (W.)                                 | 2                  |
| 39  | 3    | Elite (based on control of land or other resources (E.)) | 2                  |
| 228 | 4    | Dual (hereditary aristocracy) (D.)                       | 3                  |
| 79  | 5    | Complex (social classes) (C.)                            | 3                  |

**Table S6.** V95. Climate: Primary Environment (Coded by Frank Moore from Phillips' Comparative Atlas)

| N   | Code | Description v95.                                      | Climate category |
|-----|------|-------------------------------------------------------|------------------|
| 869 | 0    | Not coded                                             | 0                |
| 11  | 23   | Tundra (northern areas)                               | 1                |
| 21  | 36   | Northern coniferous forest                            | 1                |
| 8   | 44   | High plateau steppe                                   | 1                |
| 19  | 46   | Temperate forest (mostly mountainous)                 | 3                |
| 3   | 51   | Desert (including arctic)                             | 1                |
| 37  | 52   | Desert grasses and shrubs                             | 2                |
| 25  | 54   | Temperate grasslands                                  | 3                |
| 11  | 55   | Mediterranean (dry, deciduous, and evergreen forests) | 3                |
| 16  | 56   | Temperate woodland                                    | 2                |
| 5   | 65   | Oases and certain restricted river valleys            | 3                |
| 24  | 74   | Sub-tropical bush                                     | 2                |
| 27  | 78   | Sub-tropical rain forest                              | 2                |
| 64  | 84   | Tropical grassland                                    | 2                |
| 14  | 87   | Monsoon forest                                        | 2                |
| 113 | 88   | Tropical rain forest                                  | 2                |

**Table S7.** EA Data: Cultures, Size, Class Stratification , Climate

|    | Culture   | Size(v31) | Stratification(v66) | Climate(v95) |
|----|-----------|-----------|---------------------|--------------|
| 1  | !KUNG     | 1         | 1                   | 2            |
| 2  | ILA       | 2         | 2                   | 2            |
| 3  | NYORO     | 2         | 3                   | 2            |
| 4  | AMBBA     | 2         | 1                   | 2            |
| 5  | KPE       | 1         | 2                   | 2            |
| 6  | FON       | 3         | 3                   | 2            |
| 7  | KISSI     | 2         | 1                   | 2            |
| 8  | BAMBARA   | 3         | 3                   | 2            |
| 9  | YATENGA   | 3         | 3                   | 2            |
| 10 | KATAB     | 2         | 1                   | 2            |
| 11 | KONSO     | 3         | 2                   | 3            |
| 12 | SOMALI    | 1         | 2                   | 2            |
| 13 | WOLOF     | 3         | 3                   | 2            |
| 14 | TEDA      | 1         | 3                   | 3            |
| 15 | BARABRA   | 1         | 2                   | 1            |
| 16 | GHEG      | 2         | 1                   | 1            |
| 17 | NEWENGLAN | 3         | 3                   | 2            |
| 18 | DUTCH     | 3         | 3                   | 2            |
| 19 | SERBS     | 3         | 3                   | 2            |
| 20 | SYRIANS   | 3         | 2                   | 3            |
| 21 | SINDHI    | 3         | 2                   | 2            |
| 22 | KAZAK     | 1         | 3                   | 3            |
| 23 | GILYAK    | 1         | 1                   | 1            |
| 24 | YAKUT     | 1         | 2                   | 1            |
| 25 | KOREANS   | 3         | 3                   | 2            |
| 26 | LOLO      | 2         | 3                   | 3            |
| 27 | ABOR      | 2         | 2                   | 2            |
| 28 | CHENCHU   | 1         | 1                   | 2            |
| 29 | TAMIL     | 3         | 3                   | 2            |
| 30 | ANDAMANES | 1         | 1                   | 2            |
| 31 | MERINA    | 3         | 3                   | 2            |
| 32 | GARO      | 2         | 2                   | 2            |
| 33 | LAMET     | 1         | 2                   | 2            |
| 34 | MNONGGAR  | 2         | 2                   | 2            |
| 35 | ATAYAL    | 2         | 1                   | 2            |
| 36 | SAGADA    | 3         | 2                   | 2            |
| 37 | JAVANESE  | 3         | 3                   | 2            |
| 38 | MACASSARE | 2         | 3                   | 2            |
| 39 | ARANDA    | 1         | 1                   | 2            |
| 40 | KAPAUKU   | 1         | 2                   | 2            |



|    | Culture   | Size(v31) | Stratification(v66) | Climate(v95) |
|----|-----------|-----------|---------------------|--------------|
| 41 | WANTOAT   | 1         | 1                   | 2            |
| 42 | TRUKESE   | 2         | 1                   | 2            |
| 43 | TROBRIAND | 2         | 3                   | 2            |
| 44 | SAMOANS   | 1         | 3                   | 2            |
| 45 | TIKOPIA   | 2         | 3                   | 2            |
| 46 | NABESNA   | 1         | 1                   | 1            |
| 47 | TAREUMIUT | 2         | 2                   | 1            |
| 48 | TWANA     | 1         | 2                   | 1            |
| 49 | NOMLAKI   | 2         | 2                   | 3            |
| 50 | TENINO    | 2         | 2                   | 1            |
| 51 | OJIBWA    | 1         | 1                   | 1            |
| 52 | HURON     | 2         | 2                   | 1            |
| 53 | HANO      | 2         | 1                   | 2            |
| 54 | CUNA      | 1         | 2                   | 2            |
| 55 | WARRAU    | 1         | 1                   | 2            |
| 56 | MUNDURUCU | 1         | 1                   | 2            |
| 57 | SIRIONO   | 1         | 1                   | 2            |
| 58 | TUCUNA    | 2         | 1                   | 2            |
| 59 | INCA      | 3         | 3                   | 1            |
| 60 | YAHGAN    | 1         | 1                   | 1            |
| 61 | MATACO    | 1         | 1                   | 2            |
| 62 | TRUMAI    | 1         | 1                   | 2            |
| 63 | DOROBO    | 1         | 1                   | 2            |
| 64 | NAMA      | 2         | 2                   | 2            |
| 65 | LOZI      | 1         | 3                   | 2            |
| 66 | BEMBA     | 2         | 3                   | 2            |
| 67 | KUBA      | 2         | 3                   | 2            |
| 68 | CHAGGA    | 2         | 3                   | 2            |
| 69 | KIKUYU    | 2         | 2                   | 2            |
| 70 | FANG      | 1         | 2                   | 2            |
| 71 | ASHANTI   | 3         | 3                   | 2            |
| 72 | DOGON     | 2         | 2                   | 2            |
| 73 | TALLENSI  | 2         | 2                   | 2            |
| 74 | TIV       | 2         | 1                   | 2            |
| 75 | AZANDE    | 2         | 3                   | 2            |
| 76 | MASAI     | 1         | 1                   | 2            |
| 77 | TIGRINYA  | 3         | 3                   | 2            |
| 78 | SONGHAI   | 3         | 3                   | 2            |
| 79 | SIWANS    | 3         | 2                   | 3            |
| 80 | EGYPTIANS | 3         | 3                   | 3            |

|     | Culture   | Size(v31) | Stratification(v66) | Climate(v95) |
|-----|-----------|-----------|---------------------|--------------|
| 81  | RIFFIANS  | 3         | 2                   | 3            |
| 82  | ROMANS    | 3         | 3                   | 3            |
| 83  | IRISH     | 3         | 3                   | 2            |
| 84  | LAPPS     | 1         | 2                   | 1            |
| 85  | HUTSUL    | 3         | 2                   | 3            |
| 86  | PATHAN    | 2         | 3                   | 2            |
| 87  | KHALKA    | 1         | 3                   | 2            |
| 88  | CHUKCHEE  | 1         | 2                   | 1            |
| 89  | YURAK     | 1         | 2                   | 1            |
| 90  | MIAO      | 2         | 1                   | 2            |
| 91  | BURUSHO   | 2         | 3                   | 1            |
| 92  | LEPCHA    | 2         | 2                   | 3            |
| 93  | BENGALI   | 3         | 3                   | 2            |
| 94  | MARIAGOND | 1         | 2                   | 2            |
| 95  | TODA      | 1         | 1                   | 2            |
| 96  | TANALA    | 2         | 3                   | 2            |
| 97  | VEDDA     | 1         | 1                   | 2            |
| 98  | BURMESE   | 3         | 3                   | 2            |
| 99  | SEMANG    | 1         | 1                   | 2            |
| 100 | ANNAMESE  | 3         | 3                   | 2            |
| 101 | IFUGAO    | 2         | 2                   | 2            |
| 102 | SUBANUN   | 1         | 1                   | 2            |
| 103 | BALINESE  | 2         | 3                   | 2            |
| 104 | ALORESE   | 2         | 2                   | 2            |
| 105 | MURNGIN   | 1         | 1                   | 2            |
| 106 | TIWI      | 2         | 1                   | 2            |
| 107 | WOGEO     | 1         | 1                   | 2            |
| 108 | MAJURO    | 2         | 3                   | 2            |
| 109 | IFALUK    | 1         | 1                   | 2            |
| 110 | KURTATCHI | 2         | 3                   | 2            |
| 111 | LESU      | 2         | 1                   | 2            |
| 112 | BUNLAP    | 1         | 2                   | 2            |
| 113 | LAU       | 1         | 2                   | 2            |
| 114 | PUKAPUKAN | 2         | 1                   | 2            |
| 115 | MAORI     | 2         | 3                   | 3            |
| 116 | MARQUESAN | 1         | 3                   | 2            |
| 117 | COPPERESK | 1         | 1                   | 1            |
| 118 | KASKA     | 1         | 1                   | 1            |
| 119 | YUROK     | 1         | 2                   | 3            |
| 120 | TUBATULAB | 1         | 1                   | 2            |

|     | Culture   | Size(v31) | Stratification(v66) | Climate(v95) |
|-----|-----------|-----------|---------------------|--------------|
| 121 | HAVASUPAI | 2         | 1                   | 2            |
| 122 | SANPOIL   | 1         | 1                   | 3            |
| 123 | OMAHA     | 1         | 1                   | 3            |
| 124 | CREEK     | 2         | 1                   | 3            |
| 125 | NAVAHO    | 2         | 1                   | 2            |
| 126 | ZUNI      | 3         | 1                   | 2            |
| 127 | AZTEC     | 3         | 3                   | 3            |
| 128 | BARAMACAR | 1         | 1                   | 2            |
| 129 | TAPIRAPE  | 2         | 1                   | 2            |
| 130 | JIVARO    | 1         | 1                   | 1            |
| 131 | YAGUA     | 1         | 1                   | 2            |
| 132 | AYMARA    | 2         | 2                   | 1            |
| 133 | CAYAPA    | 2         | 1                   | 2            |
| 134 | MAPUCHE   | 1         | 2                   | 3            |
| 135 | BACAIRI   | 1         | 1                   | 2            |
| 136 | NAMBICUAR | 1         | 1                   | 2            |
| 137 | AWEIKOMA  | 1         | 1                   | 2            |
| 138 | RAMCOCAME | 2         | 1                   | 2            |
| 139 | MBUTI     | 2         | 1                   | 2            |
| 140 | MBUNDU    | 2         | 3                   | 2            |
| 141 | VENDA     | 2         | 3                   | 3            |
| 142 | NYAKYUSA  | 2         | 1                   | 2            |
| 143 | MENDE     | 2         | 3                   | 2            |
| 144 | YORUBA    | 3         | 3                   | 2            |
| 145 | BIRIFOR   | 2         | 1                   | 2            |
| 146 | MAMBILA   | 2         | 1                   | 3            |
| 147 | MARGI     | 2         | 1                   | 2            |
| 148 | MAMVU     | 1         | 1                   | 2            |
| 149 | SHILLUK   | 2         | 3                   | 2            |
| 150 | LANGO     | 2         | 2                   | 2            |
| 151 | IRAQW     | 2         | 2                   | 2            |
| 152 | MZAB      | 3         | 3                   | 3            |
| 153 | KABYLE    | 2         | 1                   | 2            |
| 154 | TRISTAN   | 2         | 1                   | 3            |
| 155 | WALLOONS  | 3         | 3                   | 2            |
| 156 | CZECHS    | 3         | 3                   | 2            |
| 157 | HEBREWS   | 3         | 3                   | 3            |
| 158 | HAZARA    | 2         | 2                   | 2            |
| 159 | KORYAK    | 2         | 2                   | 1            |
| 160 | YUKAGHIR  | 1         | 1                   | 1            |

|     | Culture   | Size(v31) | Stratification(v66) | Climate(v95) |
|-----|-----------|-----------|---------------------|--------------|
| 161 | JAPANESE  | 3         | 3                   | 2            |
| 162 | MINCHINES | 3         | 3                   | 2            |
| 163 | TIBETANS  | 3         | 3                   | 1            |
| 164 | COORG     | 2         | 3                   | 2            |
| 165 | KERALA    | 3         | 3                   | 2            |
| 166 | NICOBARES | 1         | 1                   | 2            |
| 167 | SINHALESE | 3         | 3                   | 2            |
| 168 | KACHIN    | 2         | 3                   | 3            |
| 169 | PURUM     | 1         | 2                   | 2            |
| 170 | CAMBODIAN | 3         | 3                   | 2            |
| 171 | HANUNOO   | 2         | 1                   | 2            |
| 172 | DUSUN     | 2         | 2                   | 2            |
| 173 | DIERI     | 1         | 1                   | 2            |
| 174 | KARIERA   | 1         | 1                   | 2            |
| 175 | KERAKI    | 1         | 1                   | 2            |
| 176 | PONAPEANS | 1         | 3                   | 2            |
| 177 | YAPESE    | 1         | 3                   | 2            |
| 178 | ULAWANS   | 2         | 1                   | 2            |
| 179 | NASKAPI   | 1         | 1                   | 1            |
| 180 | EYAK      | 1         | 2                   | 1            |
| 181 | ATSUGEWI  | 1         | 2                   | 3            |
| 182 | MIAMI     | 2         | 1                   | 2            |
| 183 | CHEROKEE  | 2         | 1                   | 2            |
| 184 | DELAWARE  | 2         | 1                   | 2            |
| 185 | MARICOPA  | 1         | 1                   | 2            |
| 186 | TAOS      | 2         | 1                   | 2            |
| 187 | HUICHOL   | 2         | 2                   | 2            |
| 188 | CHOCO     | 1         | 1                   | 2            |
| 189 | CARINYA   | 2         | 1                   | 2            |
| 190 | GUAHIBO   | 1         | 1                   | 2            |
| 191 | CUBEO     | 1         | 1                   | 2            |
| 192 | TUNEBO    | 2         | 1                   | 2            |
| 193 | ONA       | 1         | 1                   | 1            |
| 194 | CHOROTI   | 1         | 1                   | 2            |
| 195 | CAMAYURA  | 2         | 1                   | 2            |
| 196 | BOTOCUDO  | 1         | 1                   | 2            |
| 197 | SOTHO     | 2         | 3                   | 3            |
| 198 | YAO       | 2         | 1                   | 2            |
| 199 | YOMBE     | 2         | 3                   | 2            |
| 200 | GANDA     | 3         | 3                   | 2            |

|     | Culture   | Size(v31) | Stratification(v66) | Climate(v95) |
|-----|-----------|-----------|---------------------|--------------|
| 201 | BETE      | 2         | 1                   | 2            |
| 202 | NUPE      | 2         | 3                   | 2            |
| 203 | CONIAGUI  | 1         | 1                   | 2            |
| 204 | BAYA      | 2         | 1                   | 2            |
| 205 | LUO       | 2         | 2                   | 2            |
| 206 | CHEREMIS  | 2         | 2                   | 2            |
| 207 | NURI      | 2         | 2                   | 2            |
| 208 | AINU      | 1         | 1                   | 2            |
| 209 | OKINAWANS | 3         | 3                   | 2            |
| 210 | DARD      | 2         | 3                   | 2            |
| 211 | BHIL      | 1         | 3                   | 2            |
| 212 | AKHA      | 2         | 1                   | 2            |
| 213 | PAIWAN    | 2         | 3                   | 2            |
| 214 | WIKMUNKAN | 1         | 1                   | 2            |
| 215 | ENGA      | 2         | 1                   | 2            |
| 216 | LAKALAI   | 2         | 2                   | 2            |
| 217 | ATTAWAPIS | 1         | 1                   | 1            |
| 218 | DIEGUENO  | 2         | 1                   | 2            |
| 219 | WASHO     | 1         | 1                   | 3            |
| 220 | PAWNEE    | 2         | 3                   | 3            |
| 221 | COCHITI   | 2         | 1                   | 2            |
| 222 | YUCATECMA | 3         | 3                   | 2            |
| 223 | WAICA     | 1         | 1                   | 2            |
| 224 | TEHUELCHÉ | 1         | 1                   | 2            |
| 225 | NGONI     | 2         | 3                   | 2            |
| 226 | WUTE      | 2         | 3                   | 2            |
| 227 | BRAZILIAN | 3         | 3                   | 2            |
| 228 | BULGARIAN | 3         | 3                   | 2            |
| 229 | BASSERI   | 2         | 2                   | 2            |
| 230 | KET       | 1         | 1                   | 1            |
| 231 | MINCHIA   | 2         | 2                   | 3            |
| 232 | KHASI     | 1         | 3                   | 2            |
| 233 | SIAMESE   | 3         | 2                   | 2            |
| 234 | PURARI    | 2         | 2                   | 2            |
| 235 | ONOTOA    | 2         | 2                   | 2            |
| 236 | MANUS     | 2         | 2                   | 2            |
| 237 | YUKI      | 1         | 2                   | 3            |
| 238 | NATCHEZ   | 2         | 2                   | 2            |
| 239 | JEMEZ     | 2         | 1                   | 2            |
| 240 | BLACKCARI | 3         | 1                   | 2            |
| 241 | MAM       | 3         | 2                   | 3            |
| 242 | MISKITO   | 2         | 1                   | 2            |
| 243 | GOAJIRO   | 1         | 2                   | 2            |
| 244 | YABARANA  | 1         | 1                   | 2            |
| 245 | CHIBCHA   | 3         | 3                   | 1            |
| 246 | ALACALUF  | 1         | 1                   | 3            |
| 247 | APINAYE   | 1         | 1                   | 2            |
| 248 | TUPINAMBA | 2         | 2                   | 2            |
